# Supplementary material for: Macrophage-mediated trogocytosis contributes to destroying human schistosomes in a non-susceptible rodent host, Microtus fortis
Source: Springer Nature journal article supplement (doi:10.1038/s41421-023-00603-6), 2023-10-05
Supplement: MOESM1 [file 41421_2023_603_MOESM1_ESM.pdf]

## Supplementary information

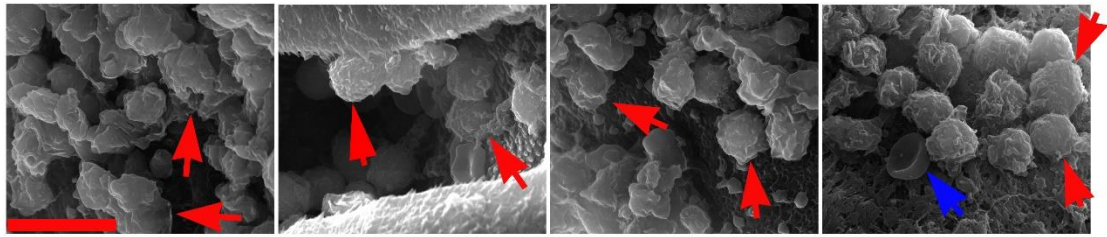

**Fig. S1 SEM showing the morphology of the cells adhered on the surface of *S. japonicum* in *M. fortis*.** Scale-bars: 10  $\mu$ m. The red arrows indicate leukocytes, and the blue arrow indicates an erythrocyte.

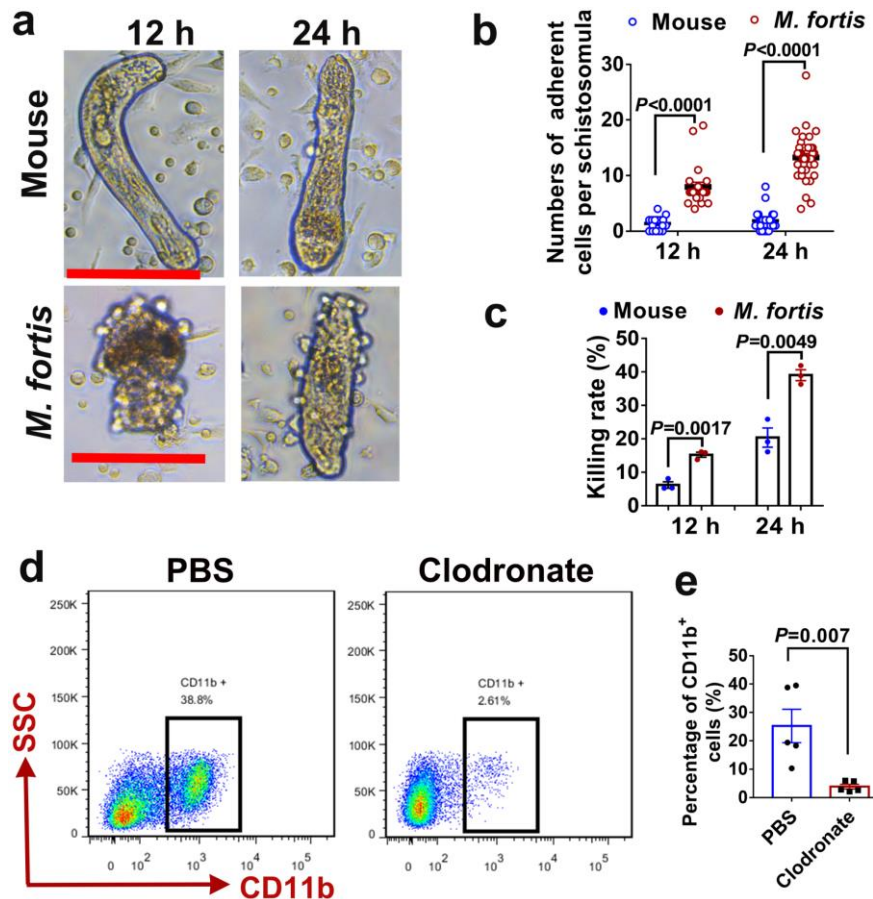

**Fig. S2 *M. fortis* macrophages mediate adherence and killing of schistosomes.** **a** *M. fortis* macrophages mediate adherence and killing of *S. mansoni* in a similar manner to *S. japonicum*. Comparison of cell adherence to the schistosomula of *S. mansoni* after incubation of the schistosomula with macrophages from BALB/c mice or *M. fortis* for 12 and 24 h in RPMI-1640 medium supplemented with 10% non-heat-inactivated FBS in vitro. Scale-bars: 100  $\mu$ m. **b** The number of cells adhering to the

schistosomula of *S. mansoni*. **c** The *S. mansoni* schistosomula killing rates after co-culture with macrophages from BALB/c mice or *M. fortis* for 12 and 24 h. The data are expressed as the mean  $\pm$  SEM of three animals per group. Data are representative of three independent experiments. **d** Flow cytometry analysis shows the percentage of CD11b<sup>+</sup> macrophages in the livers of infected *M. fortis* at 28-days post-infection treated with PBS- or clodronate- liposomes, indicating that the clodronate liposome treatment effectively depleted monocyte-macrophage cell populations in *M. fortis*. The CD11b<sup>+</sup> cells were gated from the monocyte population. **e** The frequency data of CD11b<sup>+</sup> cells from the flow cytometry presented in **d**.  $n = 5$  *M. fortis* per group. Data shown are mean  $\pm$  SEM and repeated twice with similar results.

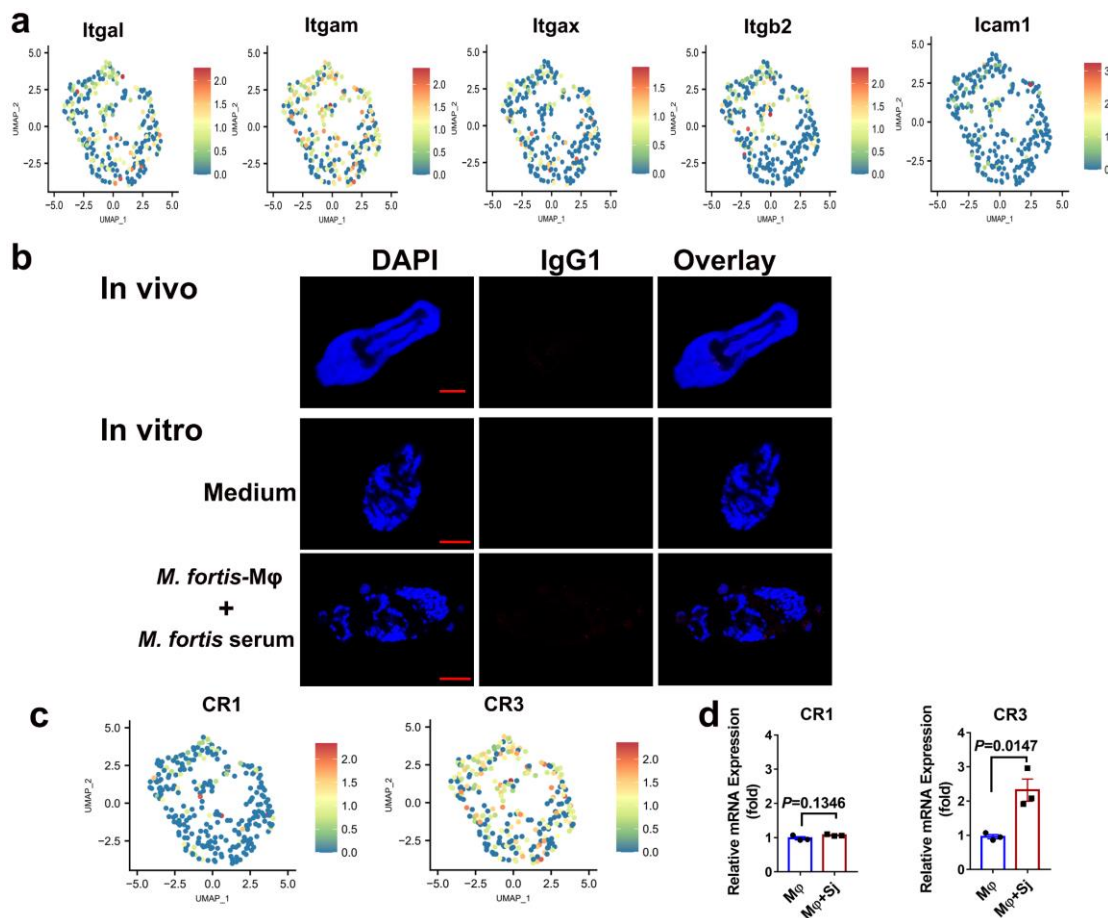

**Fig. S3 *M. fortis* macrophages mediated adherence and killing of *S. japonicum* required Complement C3 and its receptor CR3.** **a** UMAP maps show the expression of adhesion molecules in scRNA-seq analysis. CD11a (*Itgal*); CD11b (*Itgam*); CD11c (*Itgax*); CD18 (*Itgb2*); ICAM1 (*Icam1*). Data are shown as normalized transcript counts on a color-coded logarithmic scale. **b** The IgG1 isotype control of immunofluorescence detecting C3b/iC3b on the surface of *S. japonicum* collected from *M. fortis* on 13 days after infection (In vivo, scale-bars: 50  $\mu$ m) and the schistosomula co-cultured with *M. fortis* macrophages in the presence of 5% *M. fortis*

serum or culture medium alone in vitro (scale-bars: 20  $\mu$ m). The nucleus was stained with DAPI (blue). **c** UMAP maps show the expression of CR1 (*CD35*) and CR3 (*Itgam*) in scRNA-seq analysis. **d** Comparison of the relative expression of CR1 and CR3 (*Itgam*) in *M. fortis* macrophages after incubation of schistosomula of *S. japonicum* for 6 h.

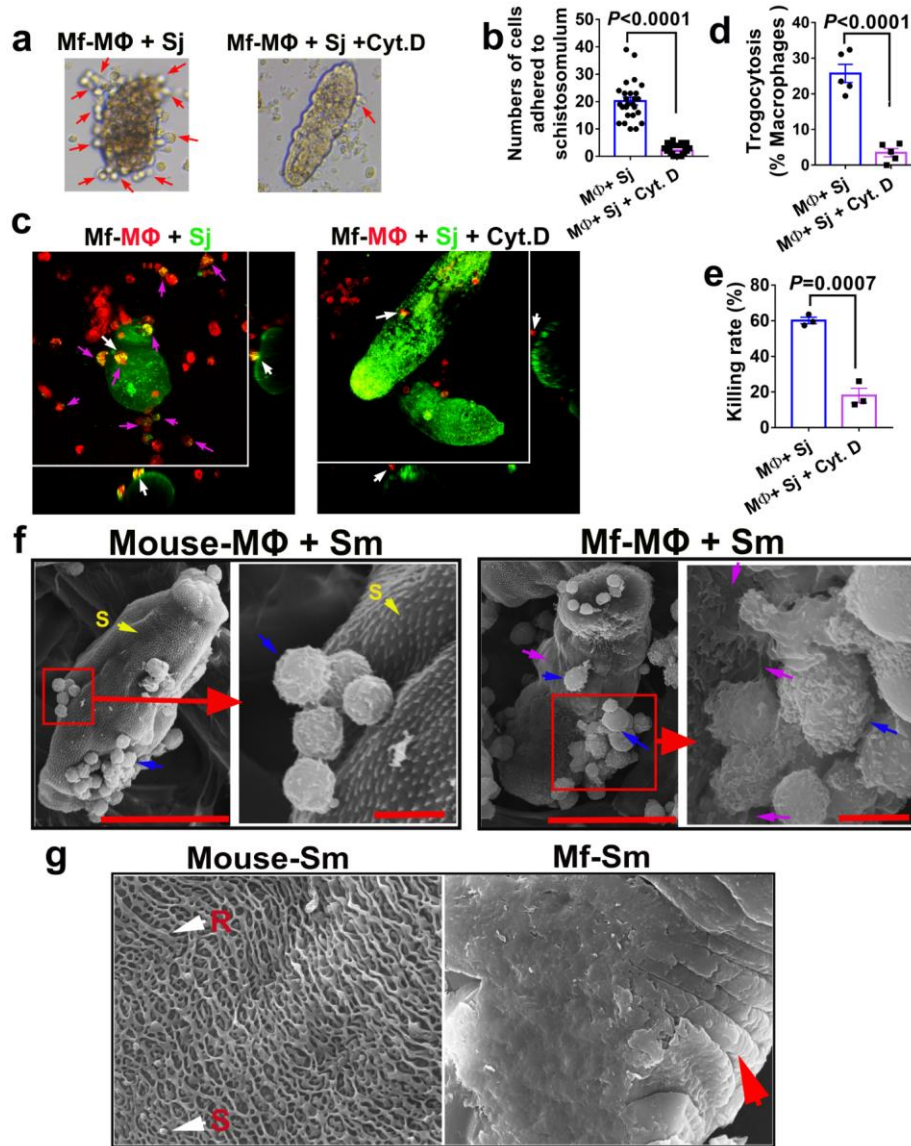

**Fig. S4 Trogocytosis participated in destroying schistosomes by *M. fortis* macrophages.** **a-e** Analysing the effects of *M. fortis* macrophages on cell adhesion to the schistosomula (a and b), trogocytosis (c and d) and the schistosomula killing rate (e) in the presence of 10  $\mu$ M cytochalasin D (Cyt. D) in vitro. The red arrows indicate macrophage adherence to schistosomula. Magenta arrows indicate the macrophages with positive trogocytosis. White arrows indicate the selected typical cell that adhered to the schistosomula.  $n = 3$  *M. fortis*. Data represent mean  $\pm$  SEM and repeated twice with similar results. **f** SEM images of the trogocytic outcomes on the surface of

schistosomula (*S. mansoni*) by macrophages (blue arrows) isolated from mouse (Mouse- MΦ) and *M. fortis* (Mf- MΦ) after incubation for 16 h in the presence of 5% serum. S, spine; Sm, *S. mansoni*. Yellow arrows show the remaining spines in the epidermis of schistosomula; magenta arrows show the exposed muscle layer through the bitten off epidermis of schistosomula. The whole worm was photographed at 3500× (Scale-bars: 40 μm); local parts of the worm were photographed at 15,000× (Scale-bars: 5 μm). **g** SEM images of the trophocytic outcomes of *S. mansoni* by leukocytes in the mouse and *M. fortis* on 21 days post-infection. Sm, *S. mansoni*; R, ridge; S, spine. Red arrows show the exposed muscle layer after the epidermis exfoliated. Similar results were obtained with experiments repeated twice.

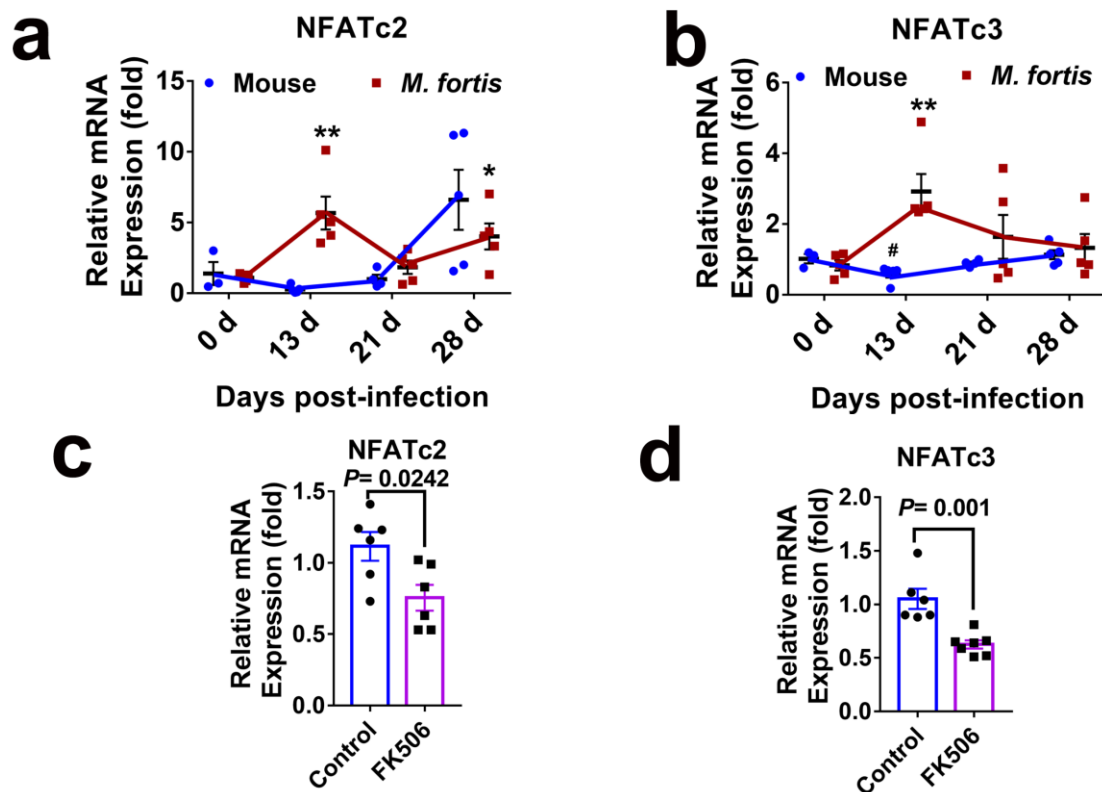

**Fig. S5 The expression of NFATc2 and NFATc3 in the liver of mice and *M. fortis*.** **a-b** Comparison of the relative expression of NFATc2 and NFATc3 in the liver of mice and *M. fortis* during different periods of *S. japonicum* infection. \*\* $P < 0.01$ , compared with the *M. fortis* group on 0 day; # $P < 0.05$ , compared with the mouse group on 0 day. **c-d** The NFAT inhibitor FK506 efficiently diminished the expression of NFATc2 and NFATc3 in the liver of *M. fortis* infected with *S. japonicum*. All data are expressed as the mean  $\pm$  SEM. All data are expressed as the mean  $\pm$  SEM of 5-6 animals per group. Data are representative of at least three independent experiments.

**Video. S1 Dynamic detection of cell adhesion to schistosomulum of *S. japonicum* and worm vitality by co-culture of mouse macrophages and schistosomula from 0 to 12 h in vitro.**

**Video. S2 Dynamic detection of cell adhesion to schistosomulum of *S. japonicum* and worm vitality by co-culture of *M. fortis* macrophages and schistosomula from 0 to 12 h in vitro.**

**Video. S3 Dynamic detection of cell adhesion to schistosomulum and worm vitality by co-culture of *M. fortis* macrophages and schistosomula in the presence of normal *M. fortis* serum from 0 to 12 h in vitro.**

**Video. S4 Dynamic detection of cell adhesion to schistosomulum and worm vitality by co-culture of *M. fortis* macrophages and schistosomula in the presence of C3-inactivated serum of *M. fortis* with CVF treatment from 0 to 12 h in vitro.**

**Video. S5 Dynamic detection of cell adhesion to schistosomulum and worm vitality by co-culture of *M. fortis* macrophages and schistosomula in the presence of normal *M. fortis* serum and CD11b mAb from 0 to 12 h in vitro.**

**Video. S6 3D image shows BALB/c mouse macrophages (red) with trogocytic uptake of schistosomula membrane material (green) after co-culturing for 12 h.**

**Video. S7 3D image shows *M. fortis* macrophages (red) with trogocytic uptake of schistosomula membrane material (green) after co-culturing for 12 h.**

**Video. S8 3D image shows *M. fortis* macrophages (red) with trogocytic uptake of schistosomula membrane material (green) after treatment with the trogocytosis inhibitor PP2.**

**Video. S9 Dynamic detection of cell adhesion to schistosomulum and worm vitality by co-culture of *M. fortis* macrophages and schistosomula in the presence of normal *M. fortis* serum and 2-APB from 0 to 12 h in vitro.**

**Supplementary Table S1. Primer sequences used in the study**

| Species              | Gene   | Foward (5'-3')       | Reverse (5'-3')      |
|----------------------|--------|----------------------|----------------------|
| <i>M.<br/>fortis</i> | GAPDH  | CCACCCATGGCAAGTTCAAA | ATCTCGCTCCTGGAAGATGG |
|                      | CR1    | TGCCATTCTACTGGGCTTGA | GAAGGAACAGCAGCAGGATG |
|                      | Itgam  | CCACTTATTGTGGGCAGCTC | TATTGCCGCTTGAAGAAGCC |
|                      | Nfatc2 | TCACTACTCACCCACCAACC | TGGTAGCTCTGTGGTTCAGG |
|                      | Nfatc3 | TCAGCTGCAGTCTATGCCTT | GACCTCCTTGGCCTGTACTT |
| <b>Murine</b>        | GAPDH  | AACGGATTTGGCCGTATTGG | CATTCTCGGCCTTGACTGTG |
|                      | Nfatc2 | CTGGGCAGAATTCTCGTGTG | GGCATTGCTCCAGTCAGAAG |
|                      | Nfatc3 | AGGACTCCAGTTGAGAAGGC | GTGTGGAAGGACAGGTCTGA |
